# Supplementary material for: The remarkable influence of N,O-ligands in the assembly of a bis-calix[4]arene-supported [MnIV2MnIII10MnII8] cluster
Source: Royal Society of Chemistry journal article supplement (doi:10.1039/c7dt04233g), 2017-01-01
Supplement: c7dt04233g1.pdf [file c7dt04233g1.pdf]

## Supporting Information

### The remarkable influence of *N,O*-ligands in the assembly of mixed valence bis-calix[4]arene-supported Mn clusters

Information comprises:

- Figure S1: Common coordination modes for DEA, its derivatives and L<sub>1</sub>.
- Figure S2: Inter-cluster spacing along the *b* axis in the expanded crystal structure of **6**.
- Figure S3: Plot of  $\chi_M T$  versus *T* for **6** in the *T* = 5-300 K range in an applied field of *B* = 0.1 T. Inset: VTVB data.
- Figures S4 – S6: Large versions of figures 1 – 3 in the manuscript.
- Table with comparison of bond lengths relevant to discussion of the structure of **6**.
- Bond Valence Sum calculations.

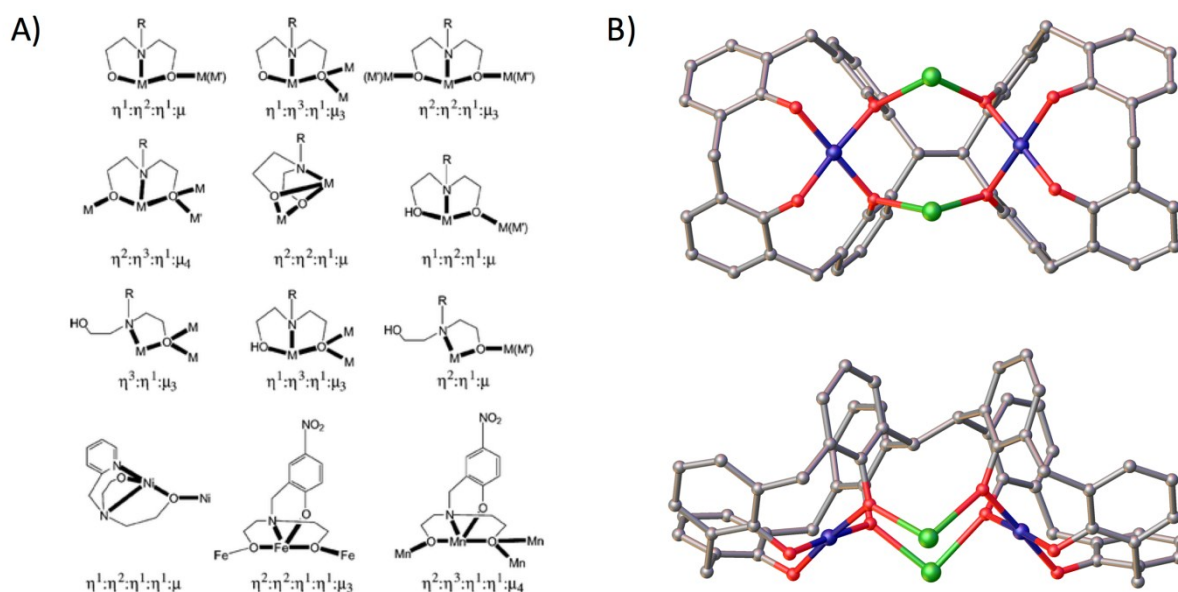

**Figure S1.** A) Common bridging coordination modes found for DEA and its derivatives, reproduced from source (Royal Society of Chemistry).<sup>S1</sup> B) Typical coordination modes found upon deprotonation of H<sub>8</sub>L1 and ligand inversion.<sup>S2</sup>

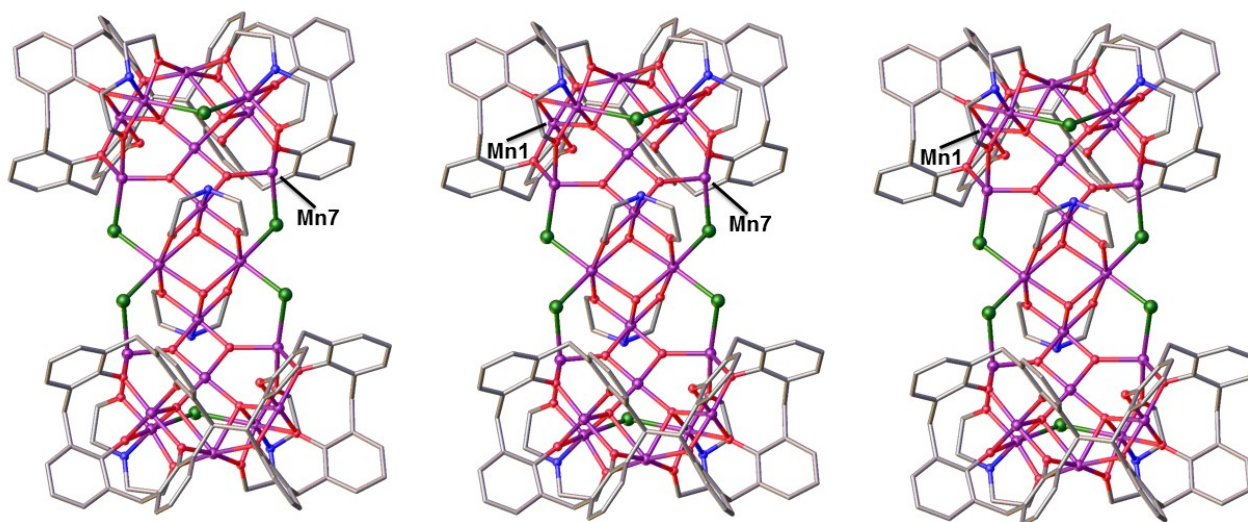

**Figure S2.** View of the ac plane in the extended structure of **6** with closest ions labelled according to discussion. Colour code: Mn – purple; O – purple; N – blue; C – grey; Cl – green. tBu groups, hydrogen atoms, ligated solvent molecules and solvent of crystallisation omitted for clarity.

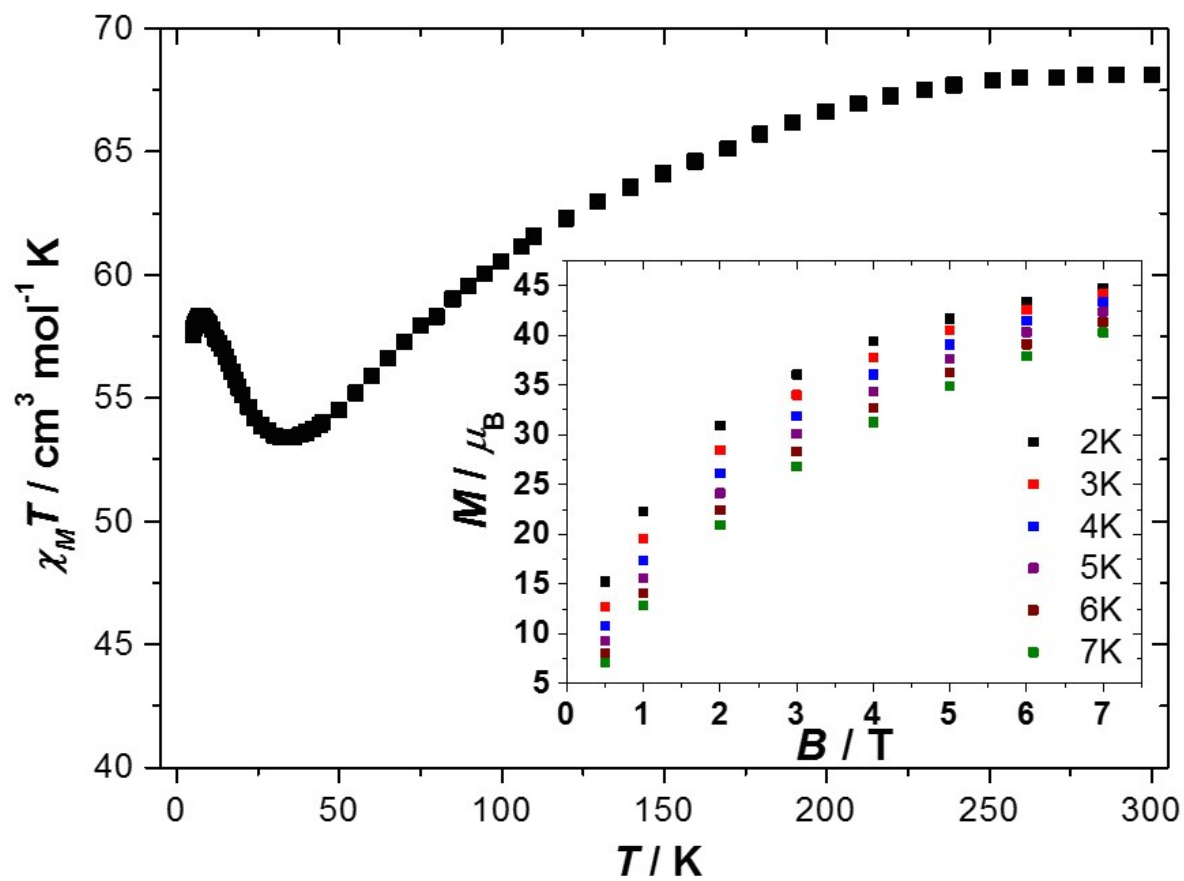

**Figure S3.** Plot of  $\chi_M T$  versus  $T$  for **6** in the  $T = 5\text{-}300 \text{ K}$  range in an applied field of  $B = 0.1 \text{ T}$ . Inset: VTVB data.

## References

- S1. A. J. Tasiopoulos and S. P. Perlepes, *Dalton Trans.*, 2008, 5537.
- S2. R. McLellan, M. A. Palacios, C. M. Beavers, S. J. Teat, S. Piligkos, E. K. Brechin, S. J. Dalgarno, *Chem. Eur. J.*, 2015, **21**, 2804; M. Coletta, R. McLellan, A. Waddington, S. Sanz, K. J. Gagnon, S. J. Teat, E. K. Brechin, S. J. Dalgarno, *Chem. Comm.*, 2016, **52**, 14246; M. Coletta, R. McLellan, S. Sanz, K. J. Gagnon, S. J. Teat, E. K. Brechin, S. J. Dalgarno, *Chem. Eur. J.*, 2017, DOI: 10.1002/chem.201703197.

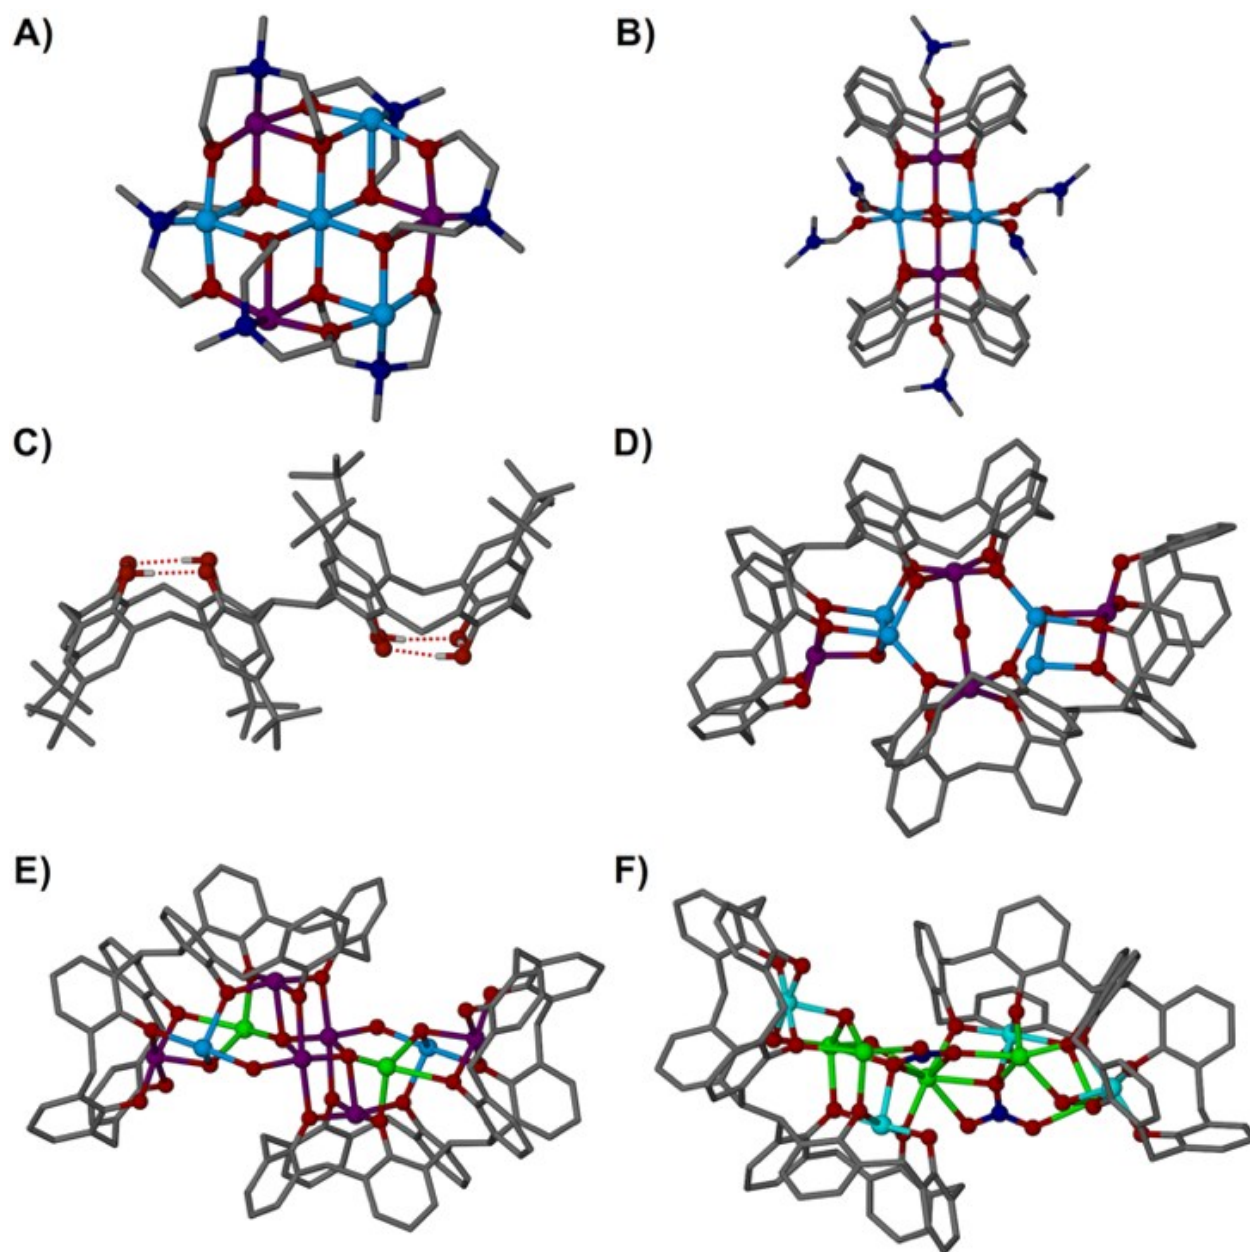

Figure S4. Large version of Figure 1 from manuscript.

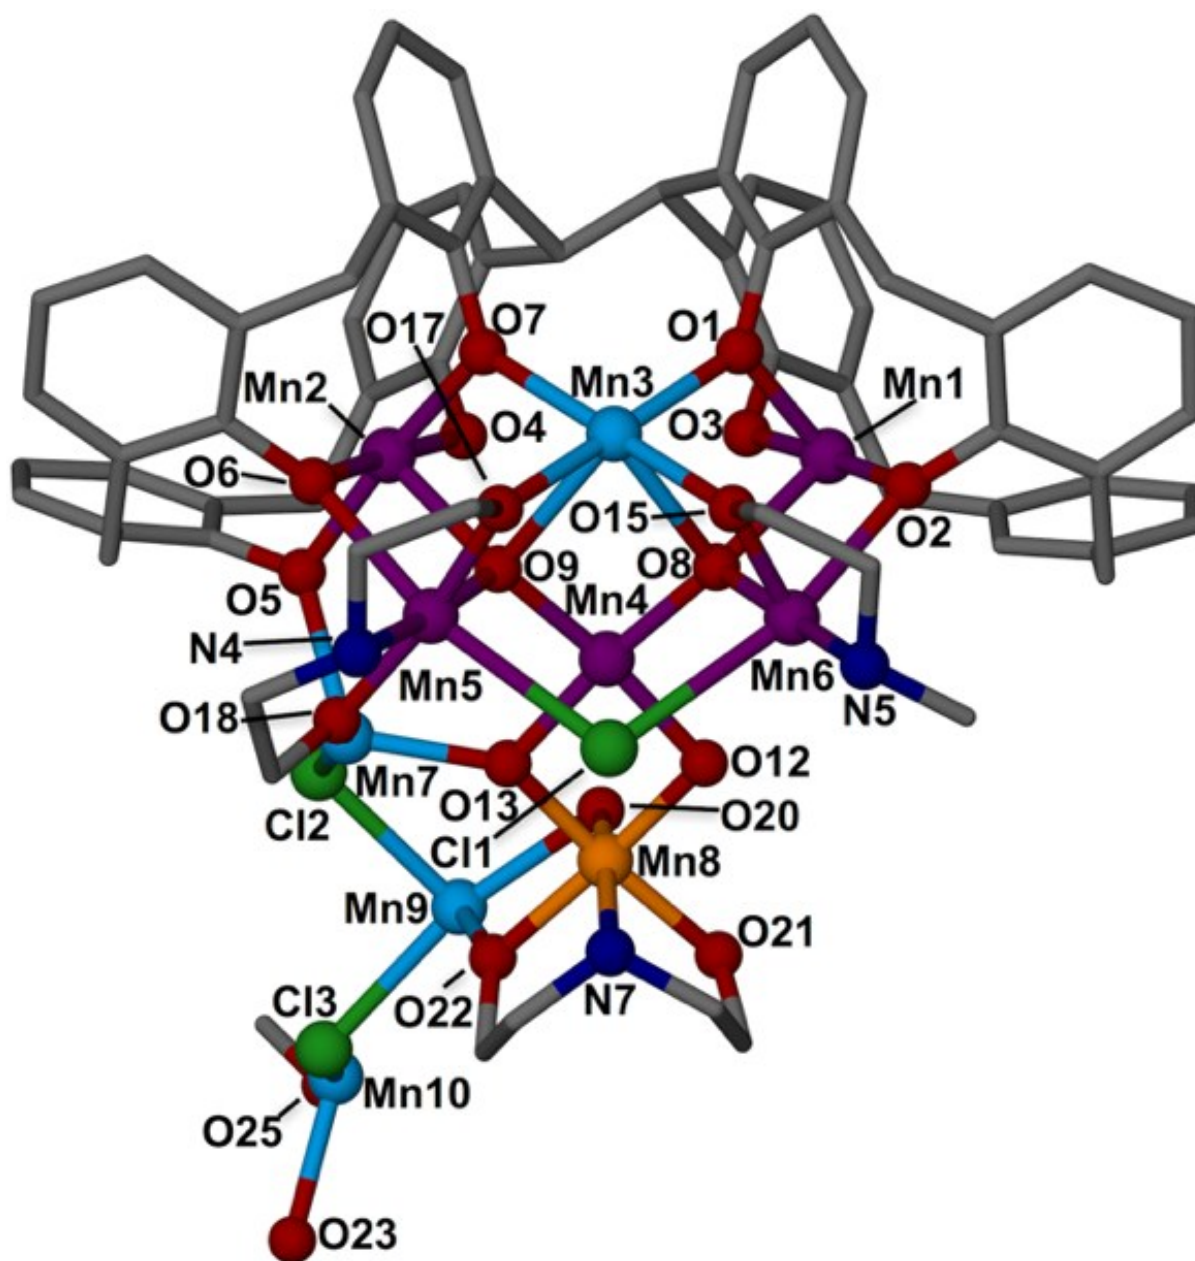

Figure S5. Large version of Figure 2 from manuscript.



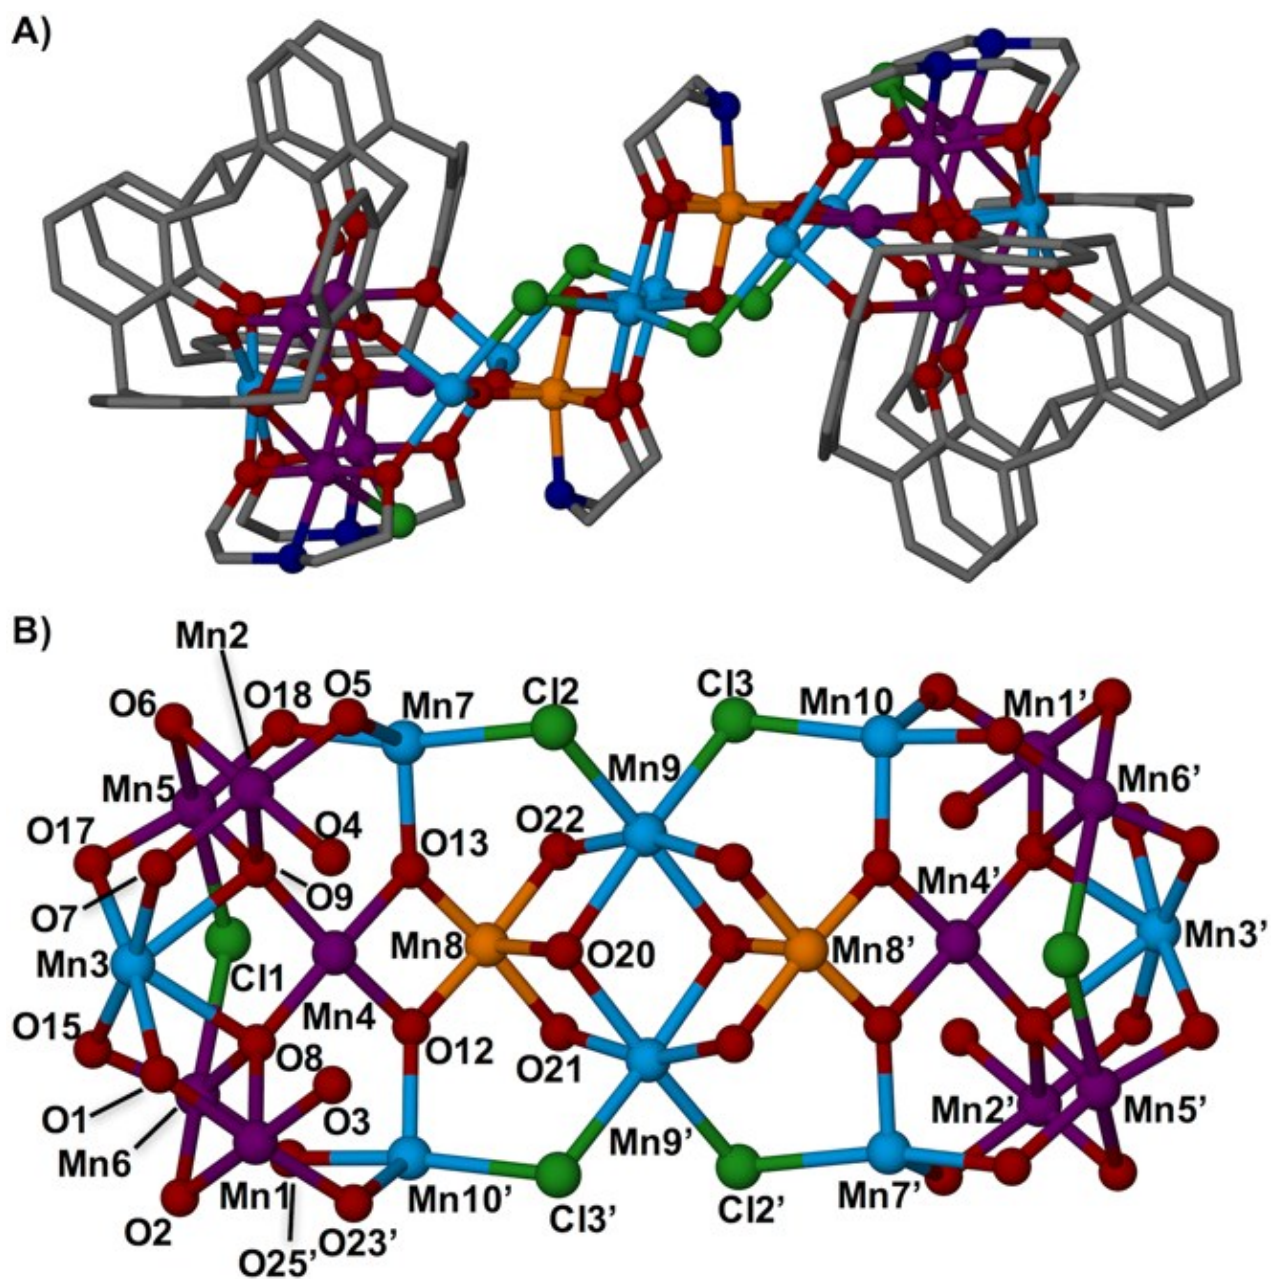

Figure S6. Large version of Figure 3 from manuscript.

|             |                |                |                |                |                 |                 |              |
|-------------|----------------|----------------|----------------|----------------|-----------------|-----------------|--------------|
| <b>Mn1</b>  | O1, 1.942(4)   | O2, 1.927(4)   | O3, 1.890(4)   | O23', 1.967(4) | O8, 2.143(3)    | O10, 2.240(4)   | -            |
| <b>Mn2</b>  | O4, 1.897(4)   | O5, 1.975(4)   | O6, 1.924(4)   | O7, 1.957(4)   | O9, 2.119(4)    | O11, 2.249(4)   | -            |
| <b>Mn3</b>  | O1, 2.210(4)   | O7, 2.209(4)   | O8, 2.416(4)   | O9, 2.509(4)   | O14, 2.200(4)   | O15, 2.180(4)   | O17 2.168(4) |
| <b>Mn4</b>  | O8, 1.894(3)   | O9, 1.885(4)   | O12, 1.865(3)  | O13, 1.866(3)  | O16, 2.281(4)   | -               | -            |
| <b>Mn5</b>  | O6, 2.321(4)   | O9, 1.849(4)   | O17, 1.866(4)  | O18, 1.890(4)  | N4, 2.018(4)    | Cl1, 2.7804(16) | -            |
| <b>Mn6</b>  | O2, 2.295(4)   | O8, 1.859(4)   | O15, 1.871(4)  | O25', 1.891(4) | N5, 2.021(5)    | Cl1, 2.8272(16) | -            |
| <b>Mn7</b>  | O5, 2.133(4)   | O13, 2.028(3)  | O18, 2.137(4)  | O19, 2.136(4)  | Cl2, 2.5214(15) | -               | -            |
| <b>Mn8</b>  | O12, 1.821(3)  | O13, 1.828(3)  | O20, 1.917(4)  | O21, 1.926(4)  | O22, 1.924(4)   | N7, 2.043(5)    | -            |
| <b>Mn9</b>  | O20, 2.240(3)  | O20', 2.255(3) | O21', 2.112(4) | O22, 2.110(4)  | Cl2, 2.4971(15) | Cl3, 2.4908(14) | -            |
| <b>Mn10</b> | O12', 2.029(3) | O23, 2.121(4)  | O24, 2.127(4)  | O25, 2.155(4)  | Cl3, 2.5311(16) | -               | -            |

**Table S1.** Bond lengths relating to the coordination spheres of crystallographically unique Mn ions in the crystal structure of **6**.



## BVS

| metal VBS   | d(M-L1)  | d(M-L2)  | d(M-L3)  | d(M-L4)   | d(M-L5)  | d(M-L6)  | r(0) | beta |
|-------------|----------|----------|----------|-----------|----------|----------|------|------|
| <b>Mn1</b>  | 1,942    | 1,927    | 1,89     | 1,967     | 2,143    | 2,24     | 1,76 | 0,37 |
|             | -0,182   | -0,167   | -0,13    | -0,207    | -0,383   | -0,48    |      |      |
|             | -0,49189 | -0,45135 | -0,35135 | -0,559459 | -1,03514 | -1,2973  |      |      |
|             | 0,611468 | 0,636767 | 0,703736 | 0,5715179 | 0,355178 | 0,273269 |      |      |
| M(Ox.State) | 3,151938 |          |          |           |          |          |      |      |

| metal VBS   | d(M-L1)  | d(M-L2)  | d(M-L3)  | d(M-L4)  | d(M-L5)  | d(M-L6)  | r(0) | beta |
|-------------|----------|----------|----------|----------|----------|----------|------|------|
| <b>Mn2</b>  | 1,897    | 1,975    | 1,924    | 1,957    | 2,119    | 2,249    | 1,76 | 0,37 |
|             | -0,137   | -0,215   | -0,164   | -0,197   | -0,359   | -0,489   |      |      |
|             | -0,37027 | -0,58108 | -0,44324 | 0,532432 | -0,97027 | -1,32162 |      |      |
|             | 0,690548 | 0,559293 | 0,641951 | 0,587175 | 0,378981 | 0,266702 |      |      |
| M(Ox.State) | 3,12465  |          |          |          |          |          |      |      |

| metal VBS   | d(M-L1)  | d(M-L2)  | d(M-L3)  | d(M-L4)   | d(M-L5)  | d(M-L6)  | d(M-L7)  | r(0) | beta |
|-------------|----------|----------|----------|-----------|----------|----------|----------|------|------|
| <b>Mn3</b>  | 2,21     | 2,416    | 2,18     | 2,168     | 2,509    | 2,2      | 2,209    | 1,79 | 0,37 |
|             | -0,42    | -0,626   | -0,39    | -0,378    | -0,719   | -0,41    | -0,419   |      |      |
|             | -1,13514 | -1,69189 | -1,05405 | -1,021622 | -1,94324 | -1,10811 | -1,13243 |      |      |
|             | 0,321379 | 0,184171 | 0,348522 | 0,3600107 | 0,143239 | 0,330183 | 0,322248 |      |      |
| M(Ox.State) | 2,009752 |          |          |           |          |          |          |      |      |

| metal VBS   | d(M-L1)  | d(M-L2)  | d(M-L3)  | d(M-L4)   | d(M-L5)  | r(0) | beta |
|-------------|----------|----------|----------|-----------|----------|------|------|
| <b>Mn4</b>  | 1,894    | 1,885    | 1,866    | 1,865     | 2,281    | 1,76 | 0,37 |
|             | -0,134   | -0,125   | -0,106   | -0,105    | -0,521   |      |      |
|             | -0,36216 | -0,33784 | -0,28649 | -0,283784 | -1,40811 |      |      |
|             | 0,696169 | 0,713311 | 0,750897 | 0,7529294 | 0,244606 |      |      |
| M(Ox.State) | 3,157913 |          |          |           |          |      |      |

| metal VBS   | d(M-L1)  | d(M-L2)  | d(M-L3)  | d(M-L4)   | d(M-L5)  | d(M-L6)  | r(0) | beta |
|-------------|----------|----------|----------|-----------|----------|----------|------|------|
| <b>Mn5</b>  | 1,849    | 1,866    | 1,89     | 2,018     | 2,321    | 2,7804   | 1,76 | 0,37 |
|             | -0,089   | -0,106   | -0,13    | -0,258    | -0,561   | -1,0204  |      |      |
|             | -0,24054 | -0,28649 | -0,35135 | -0,697297 | -1,51622 | -2,75784 |      |      |
|             | 0,786203 | 0,750897 | 0,703736 | 0,4979292 | 0,219541 | 0,063429 |      |      |
| M(Ox.State) | 3,021735 |          |          |           |          |          |      |      |

| metal VBS   | d(M-L1)  | d(M-L2)  | d(M-L3)  | d(M-L4)   | d(M-L5)  | d(M-L6)  | r(0) | beta |
|-------------|----------|----------|----------|-----------|----------|----------|------|------|
| <b>Mn6</b>  | 1,859    | 1,871    | 1,891    | 2,021     | 2,295    | 2,8272   | 1,76 | 0,37 |
|             | -0,099   | -0,111   | -0,131   | -0,261    | -0,535   | -1,0672  |      |      |
|             | -0,26757 | -0,3     | -0,35405 | -0,705405 | -1,44595 | -2,88432 |      |      |
|             | 0,765239 | 0,740818 | 0,701837 | 0,4939083 | 0,235523 | 0,055893 |      |      |
| M(Ox.State) | 2,993218 |          |          |           |          |          |      |      |

| metal VBS   | d(M-L1)  | d(M-L2)  | d(M-L3)  | d(M-L4)   | d(M-L5)  | r(0) | beta |
|-------------|----------|----------|----------|-----------|----------|------|------|
| <b>Mn7</b>  | 2,133    | 2,137    | 2,136    | 2,028     | 2,5214   | 1,79 | 0,37 |
|             | -0,343   | -0,347   | -0,346   | -0,238    | -0,7314  |      |      |
|             | -0,92703 | -0,93784 | -0,93514 | -0,643243 | -1,97676 |      |      |
|             | 0,395728 | 0,391473 | 0,392533 | 0,5255851 | 0,138518 |      |      |
| M(Ox.State) | 1,843837 |          |          |           |          |      |      |

| metal VBS   | d(M-L1)  | d(M-L2)  | d(M-L3)  | d(M-L4)   | d(M-L5)  | d(M-L6) | r(0)  | beta |
|-------------|----------|----------|----------|-----------|----------|---------|-------|------|
| <b>Mn8</b>  | 1,821    | 1,828    | 1,917    | 1,926     | 2,043    | 1,924   | 1,753 | 0,37 |
|             | -0,068   | -0,075   | -0,164   | -0,173    | -0,29    | -0,171  |       |      |
|             |          |          |          |           |          |         |       |      |
|             | -0,18378 | -0,2027  | -0,44324 | -0,467568 | -0,78378 | 0,46216 |       |      |
|             | 0,832116 | 0,816521 | 0,641951 | 0,6265244 | 0,456675 | 0,62992 |       |      |
| M(Ox.State) | 4,003707 |          |          |           |          |         |       |      |

| metal VBS   | d(M-L1)  | d(M-L2)  | d(M-L3)  | d(M-L4)   | d(M-L5) | d(M-L6)  | r(0) | beta |
|-------------|----------|----------|----------|-----------|---------|----------|------|------|
| <b>Mn9</b>  | 2,254    | 2,24     | 2,112    | 2,11      | 2,4971  | 2,4908   | 1,79 | 0,37 |
|             | -0,464   | -0,45    | -0,322   | -0,32     | -0,7071 | -0,7008  |      |      |
|             |          |          |          |           | -       |          |      |      |
|             | -1,25405 | -1,21622 | -0,87027 | -0,864865 | 1,91108 | -1,89405 |      |      |
|             | 0,285346 | 0,296349 | 0,418838 | 0,4211085 | 0,14792 | 0,150461 |      |      |
| M(Ox.State) | 1,720023 |          |          |           |         |          |      |      |

| metal VBS   | d(M-L1)  | d(M-L2)  | d(M-L3)  | d(M-L4)  | d(M-L5)  | r(0) | beta |
|-------------|----------|----------|----------|----------|----------|------|------|
| <b>Mn10</b> | 2,121    | 2,155    | 2,029    | 2,127    | 2,5311   | 1,79 | 0,37 |
|             | -0,331   | -0,365   | -0,239   | -0,337   | -0,7411  |      |      |
|             |          |          |          |          | -        |      |      |
|             | -0,89459 | -0,98649 | -0,64595 | 0,910811 | -2,00297 |      |      |
|             | 0,408773 | 0,372885 | 0,524166 | 0,402198 | 0,134934 |      |      |
| M(Ox.State) | 1,842956 |          |          |          |          |      |      |
